# Supplementary material for: Morphology-mediated tailoring of the performance of porous nanostructured Mn2O3as an anode material
Source: Royal Society of Chemistry journal article supplement (doi:10.1039/c4ce01334d), 2014-01-01
Supplement: c4ce01334d1.pdf [file c4ce01334d1.pdf]

## Electronic Supplementary Information (ESI)

### **Morphology mediated tailoring the performance of porous nanostructured Mn<sub>2</sub>O<sub>3</sub> as anode material**

Provas Pal,<sup>a</sup> Arnab Kanti Giri,<sup>a</sup> Sourindra Mahanty,<sup>b,\*</sup> Asit Baran Panda<sup>a,\*</sup>

<sup>a</sup>Discipline of Inorganic Materials and Catalysis, Central Salt and Marine Chemicals

Research Institute (Council of Scientific and Industrial Research), G.B. Marg, Bhavnagar-  
364021, Gujarat, India.

<sup>b</sup> Fuel Cell & Battery Division, CSIR-Central Glass and Ceramic Research Institute, Kolkata  
- 700032, India

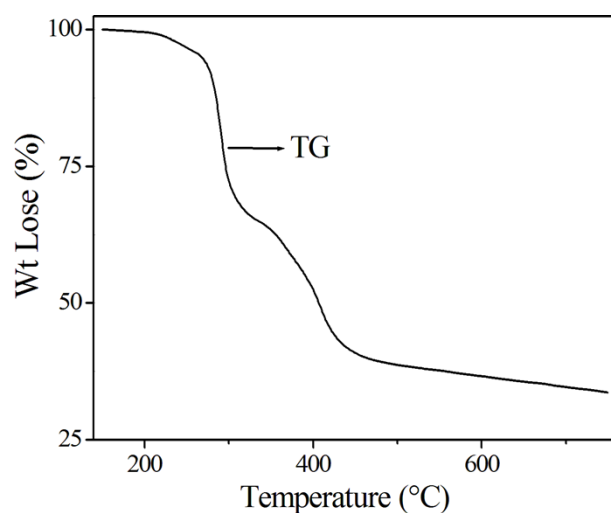

**Figure S1** TG analysis curve of the synthesized lotus shaped  $\text{MnCO}_3$  in air at a rate of  $5^\circ\text{C min}^{-1}$ .

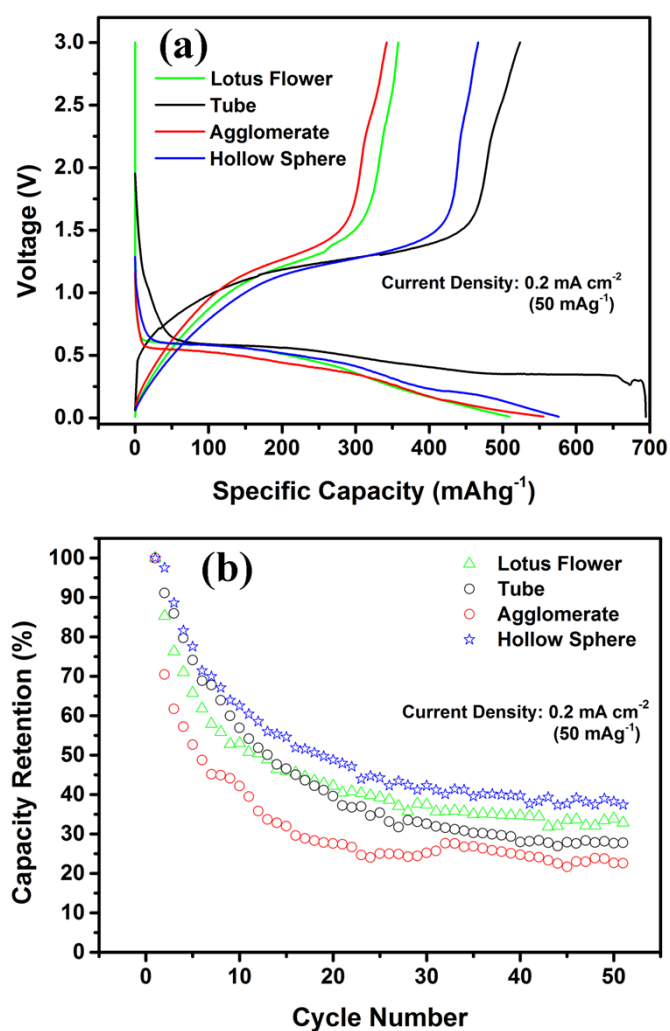

**Figure S2** (a) Discharge-charge profiles of  $\text{Mn}_2\text{O}_3//\text{Li}$  cells for the 2<sup>nd</sup> cycle (b) capacity retention plots for of the synthesized  $\text{Mn}_2\text{O}_3$  with different shapes

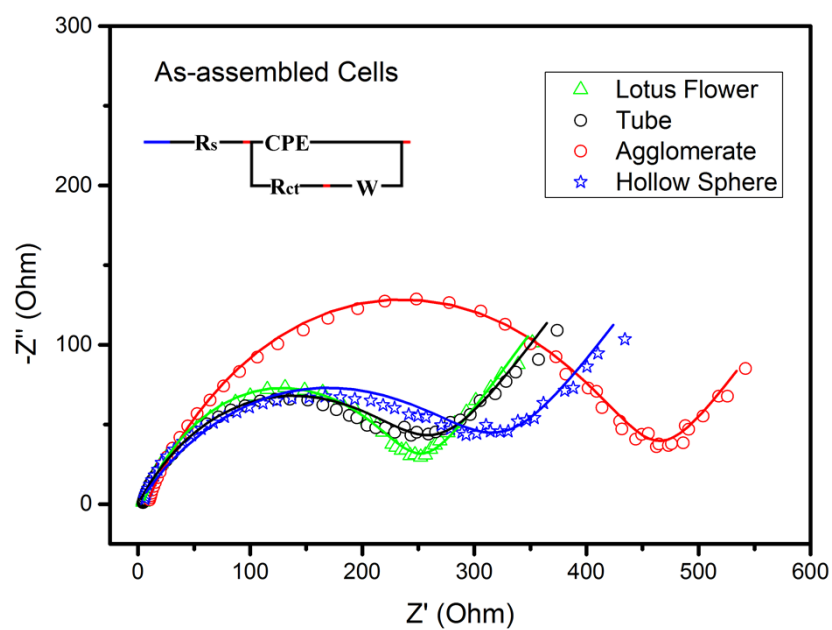

**Fig. S3.** Impedance spectra of as-assembled  $\text{Mn}_2\text{O}_3//\text{Li}$  cells. Solid lines represent fitted plot using the equivalent circuit shown in the inset.

**Table S1:** Fitted impedance data for as-assembled  $\text{Mn}_2\text{O}_3//\text{Li}$  cells

| Sample        | $R_s$ ( $\Omega$ ) | $R_{ct}$ ( $\Omega$ ) | CPE ( $\mu\text{F}$ ) | W ( $\Omega$ ) |
|---------------|--------------------|-----------------------|-----------------------|----------------|
| Lotus Flower  | 4.1                | 242                   | 35                    | 82             |
| Tube          | 4.4                | 263                   | 85                    | 87             |
| Agglomerate   | 7.3                | 450                   | 26                    | 63             |
| Hollow Sphere | 4.6                | 327                   | 83                    | 86             |

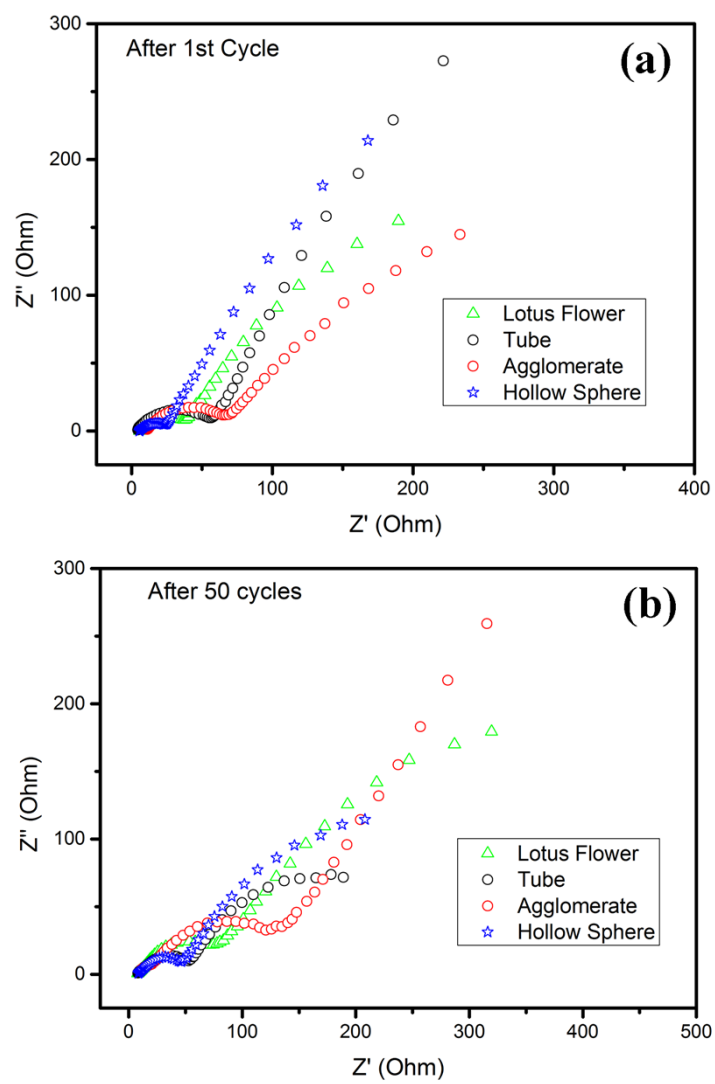

**Fig. S4.** Impedance spectra of  $\text{Mn}_2\text{O}_3/\text{Li}$  cells at different cycling intervals (a) after the 1<sup>st</sup> cycle and (b) after the 50<sup>th</sup> cycle.
